# Supplementary material for: Quantifying critical states of complex diseases using single-sample dynamic network biomarkers
Source: PLoS Comput Biol. 2017 Jul 5;13(7):e1005633. doi: 10.1371/journal.pcbi.1005633 (PMC5517040; doi:10.1371/journal.pcbi.1005633)
Supplement: S3 Table — (XLSX) [file pcbi.1005633.s005.xlsx]

## Sheet: Table S3
Table S3: the overlapped genes among sDNB
Gene symbols	Function	Virus related gene	Influenza related gene
CHMP5	charged multivesicular body protein 5	No	No
IFIT2	interferon induced protein with tetratricopeptide repeats 2	Yes	No
IFIT3	interferon induced protein with tetratricopeptide repeats 3	Yes	No
DDX58	DEXD/H-box helicase 58	Yes	Yes
TNFSF10	tumor necrosis factor superfamily member 10	Yes	Yes
CXCL10	chemokine (C-X-C motif) ligand 10	Yes	Yes
IFIT5	interferon induced protein with tetratricopeptide repeats 5	Yes	No
STAG2	stromal antigen 2	No	No
TRIM22	tripartite motif containing 22	Yes	No
LAP3	leucine aminopeptidase 3	No	No
MX2	MX dynamin-like GTPase 2	Yes	Yes
CCL2	chemokine (C-C motif) ligand 2	Yes	Yes
AP1S2	adaptor related protein complex 1 sigma 2 subunit	Yes	No
CAPZA2	capping protein (actin filament) muscle Z-line, alpha 2	No	No
IFI35	interferon induced protein 35	Yes	No
IFIT1	interferon induced protein with tetratricopeptide repeats 1	Yes	No
TIMM10	translocase of inner mitochondrial membrane 10 homolog	No	No
ATF3	activating transcription factor 3	Yes	No
MX1	MX dynamin-like GTPase 1	Yes	Yes
IFI16	interferon, gamma-inducible protein 16	Yes	No
CLIC1	chloride intracellular channel 1	No	No
SCARB2	scavenger receptor class B member 2	Yes	No
HERC5	HECT and RLD domain containing E3 ubiquitin protein ligase 5	Yes	No
STAT1	signal transducer and activator of transcription 1	Yes	No
BST2	bone marrow stromal cell antigen 2	Yes	No
